# Supplementary material for: Highly Enhanced OER Performance by Er-Doped Fe-MOF Nanoarray at Large Current Densities
Source: MDPI journal article supplement (doi:10.3390/nano11071847), 2021-07-16
Supplement: s1 [file s1]

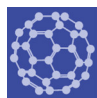

# Highly Enhanced OER Performance by Er-Doped Fe-MOF Nanoarray at Large Current Densities

Yan Ma <sup>1</sup>, Yujie Miao <sup>1</sup>, Guomei Mu <sup>1</sup>, Dunmin Lin <sup>1</sup>, Chenggang Xu <sup>1</sup>, Wen Zeng <sup>2</sup> and Fengyu Xie <sup>\*1</sup>

<sup>1</sup> College of Chemistry and Materials Science, Sichuan Normal University, No. 5, Jing'an Road, Chengdu 610068, China; 20191201038@stu.sicnu.edu.cn (Y.M.); yujie@stu.sicnu.edu.cn (Y.M.); guomei@stu.sicnu.edu.cn (G.M.); ddmd222@sicnu.edu.cn (D.L.); chenggangxu@163.com (C.X.)

<sup>2</sup> School of Chemistry and Chemical Engineering, Chongqing University, Shapingba District, Chongqing 401331, China; wenzeng@cqu.edu.cn

\* Correspondence: xiefengyu@sicnu.edu.cn

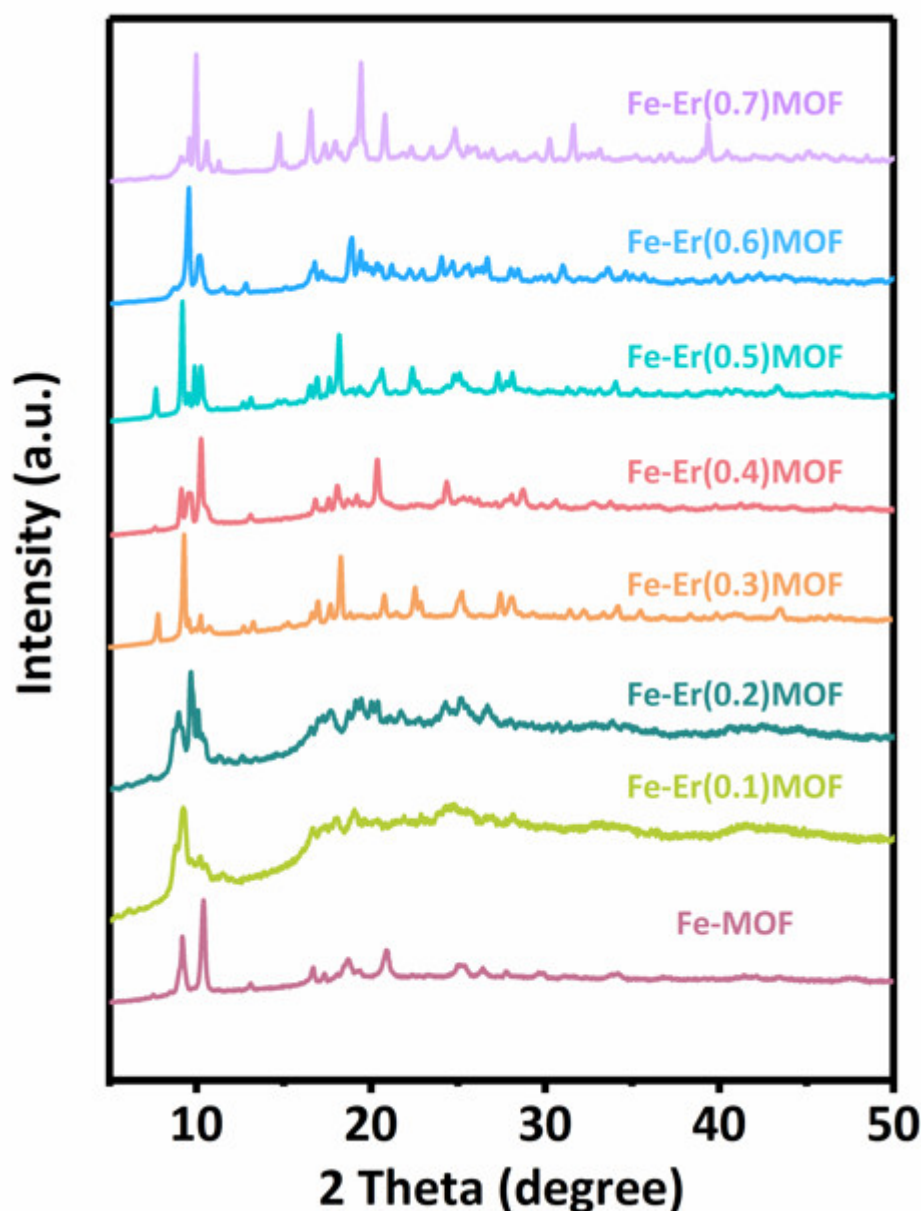

Figure S1. The XRD patterns of different Er contents of Er-doped Fe-MOF/NF.

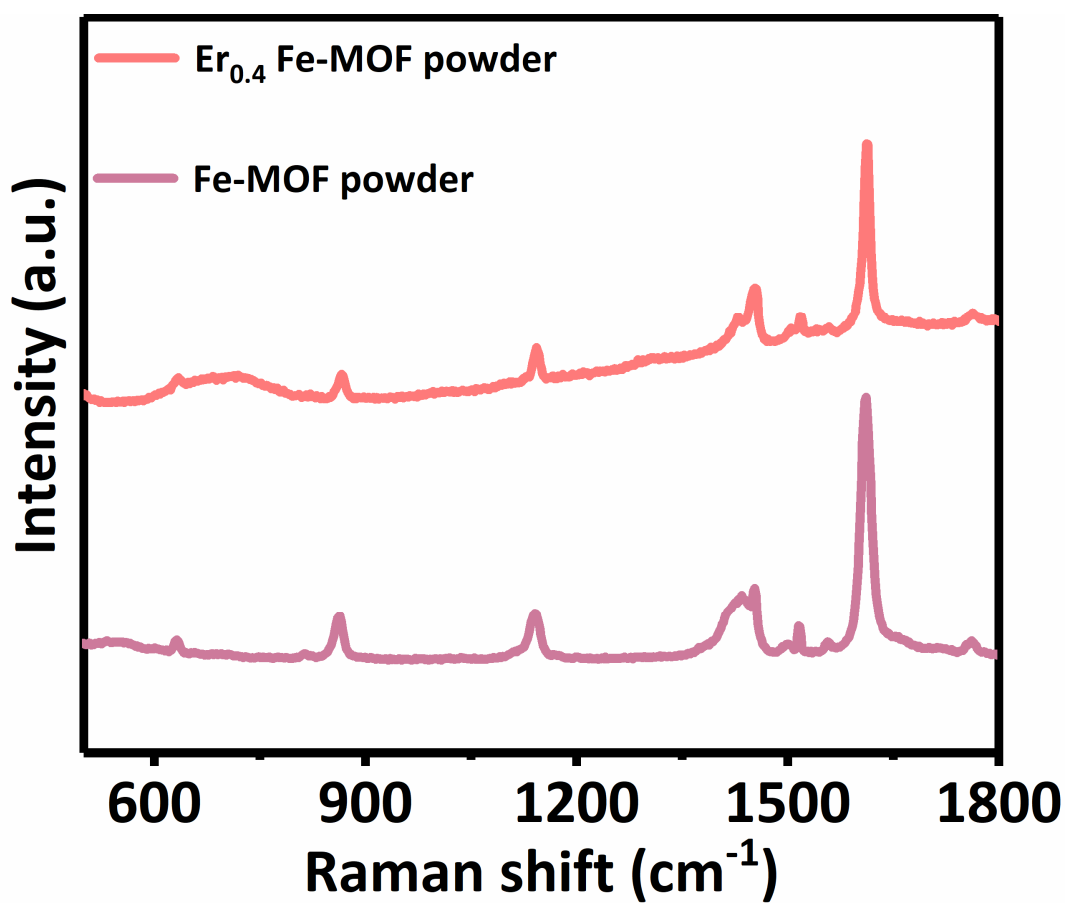

Figure S2. Raman spectra of  $\text{Er}_{0.4}$  Fe-MOF/NF and Fe-MOF/NF.

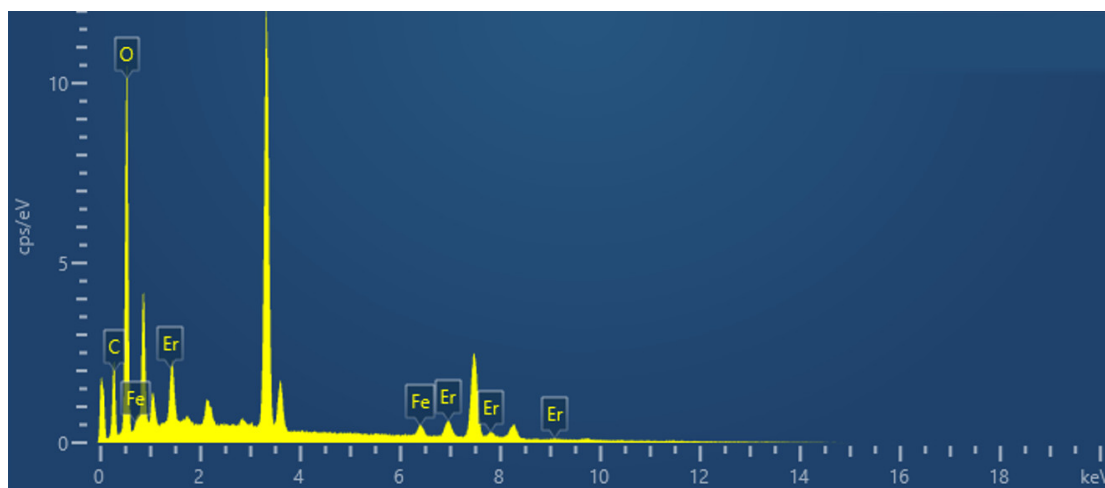

Figure S3. The EDX spectrum of  $\text{Er}_{0.4}$  Fe-MOF/NF.

Table S1. The element percentages Wt% of  $\text{Er}_{0.4}$  Fe-MOF/NF.

| Element | Line Type | Atomic Percentage | Wt%    | Wt% Sigma |
|---------|-----------|-------------------|--------|-----------|
| O       | K series  | 57.22             | 43.29  | 0.45      |
| Er      | L series  | 3.86              | 30.52  | 0.61      |
| C       | K series  | 36.94             | 20.98  | 0.38      |
| Fe      | K series  | 1.97              | 5.21   | 0.23      |
| Total:  |           | 100.00            | 100.00 |           |

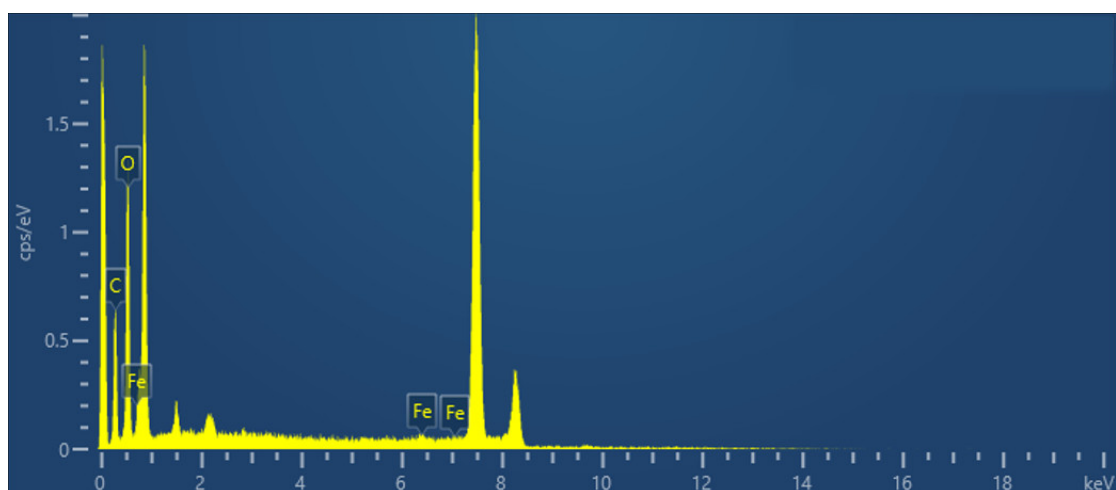

Figure S4. The EDX spectrum of Fe-MOF/NF.

Table S2. The element percentages Wt% of Fe-MOF/NF.

| Element | Line Type | Atomic Percentage | Wt%    | Wt% Sigma |
|---------|-----------|-------------------|--------|-----------|
| O       | K series  | 50.93             | 56.72  | 1.07      |
| C       | K series  | 48.34             | 40.41  | 1.00      |
| Fe      | K series  | 0.74              | 2.87   | 0.95      |
| Total:  |           | 100.00            | 100.00 |           |

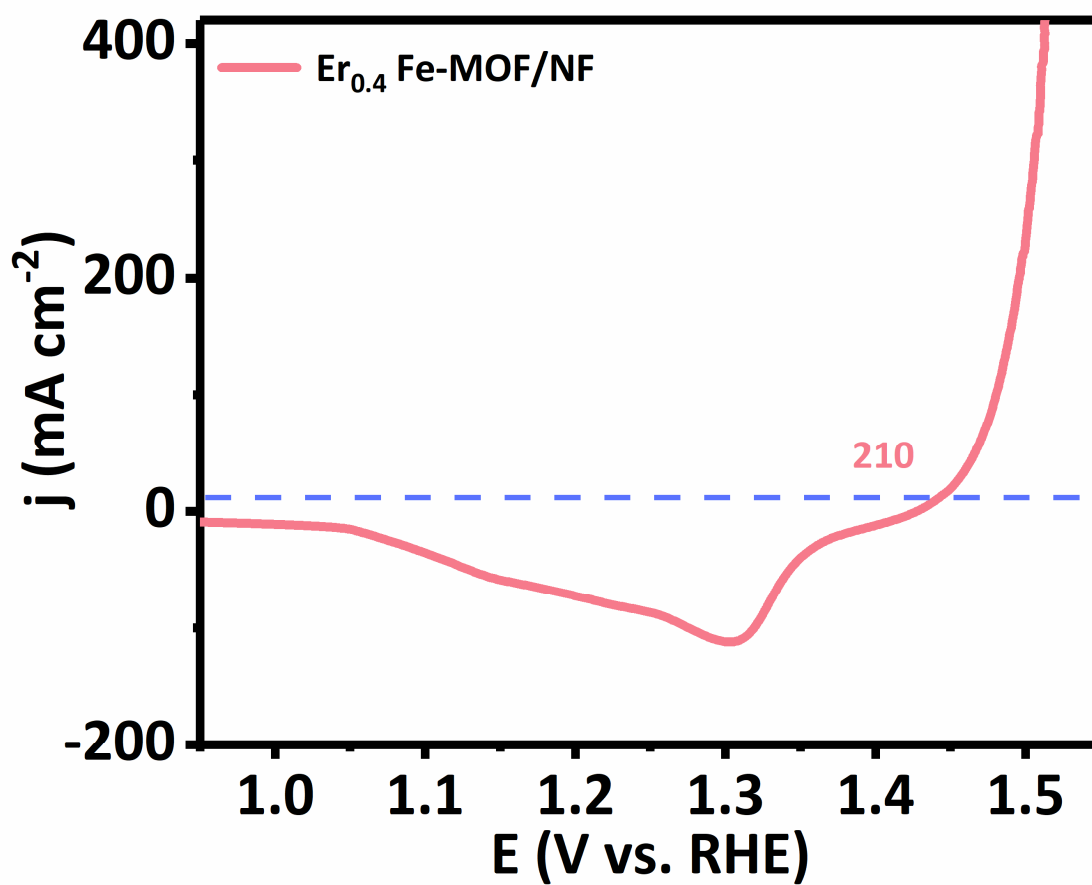

Figure S5. LSV curve of  $\text{Er}_{0.4}\text{Fe-MOF/NF}$  for OER in 1.0 M KOH.

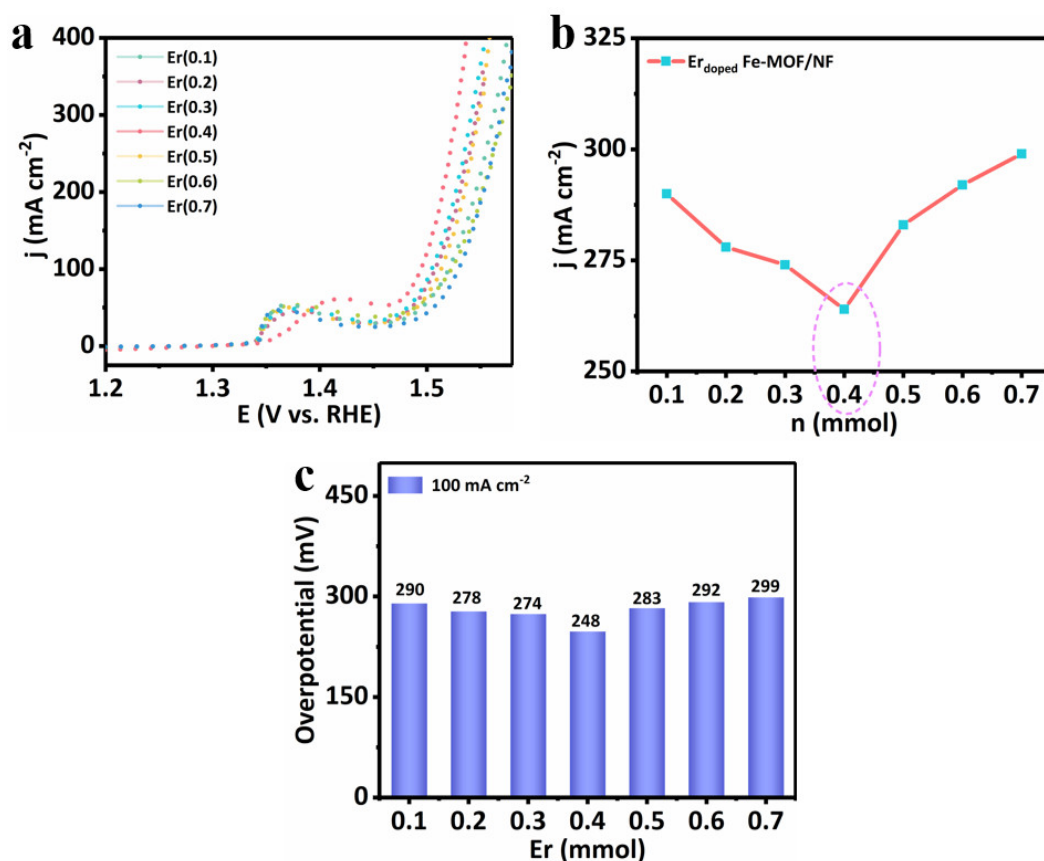

**Figure S6.** LSV curves (a) and comparison of the overpotential of different Er contents of Er-doped Fe-MOF/NF at 100 mA cm<sup>-2</sup> (b,c).

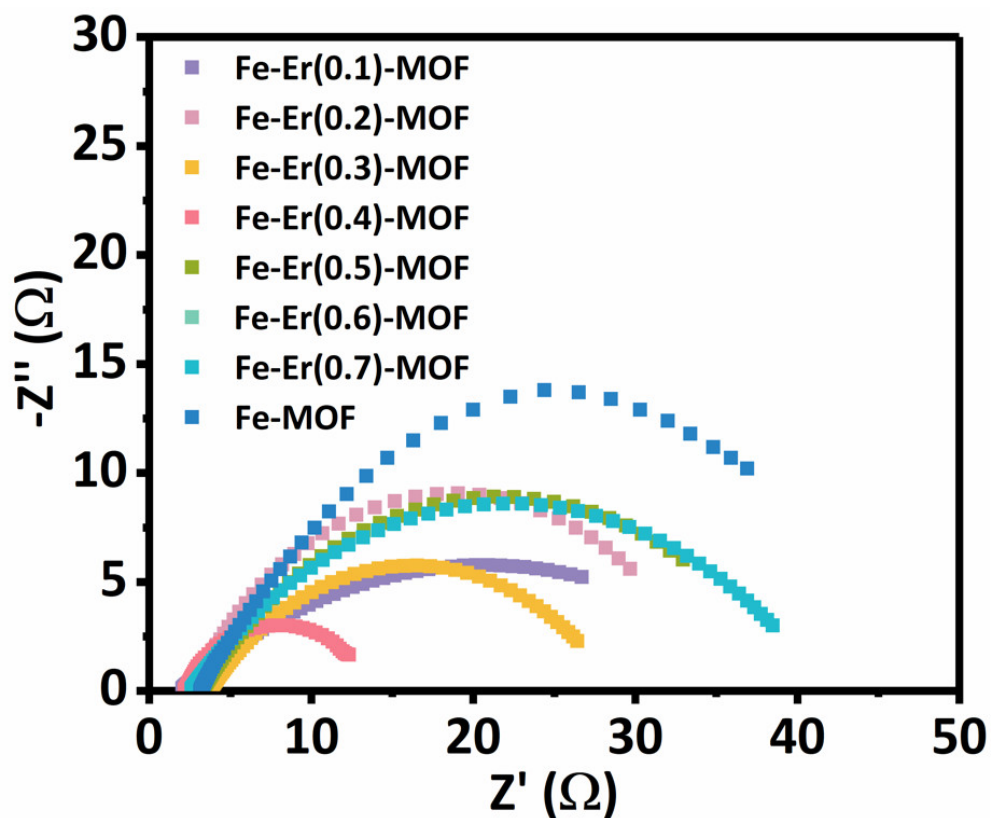

**Figure S7.** EIS of different Er contents of Er-doped Fe-MOF/NF.

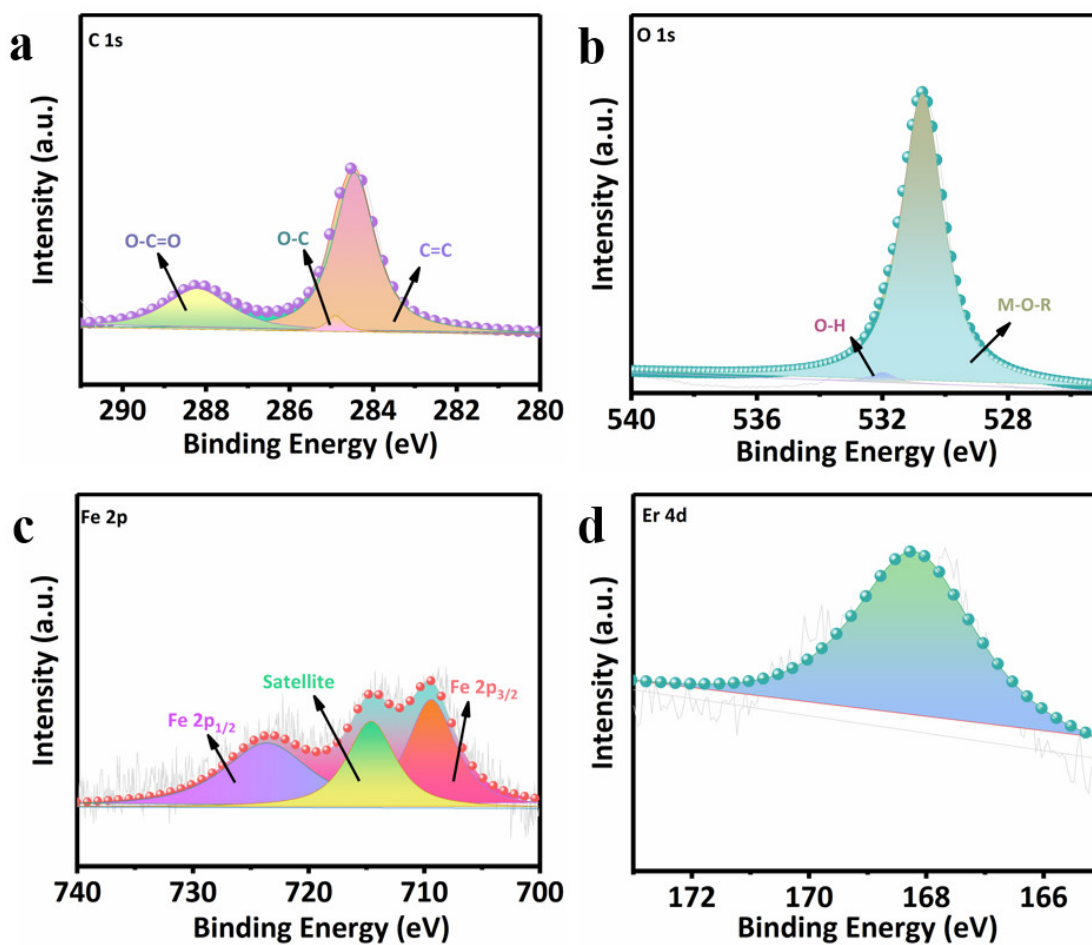

Figure S8. The XPS spectra of C 1s (a), O 1s (b), Fe 2p (c), and Er 4d (d) after i-t testing.

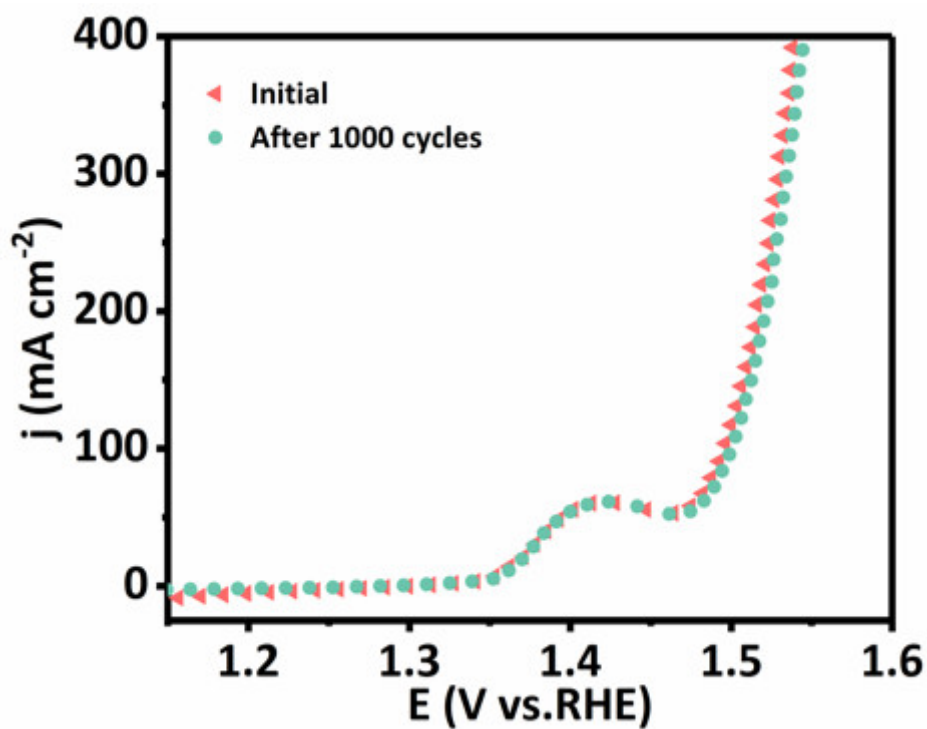

Figure S9. LSV curves of Er<sub>0.4</sub> Fe-MOF/NF before and after 1000 CV cycles in 1.0 M KOH.

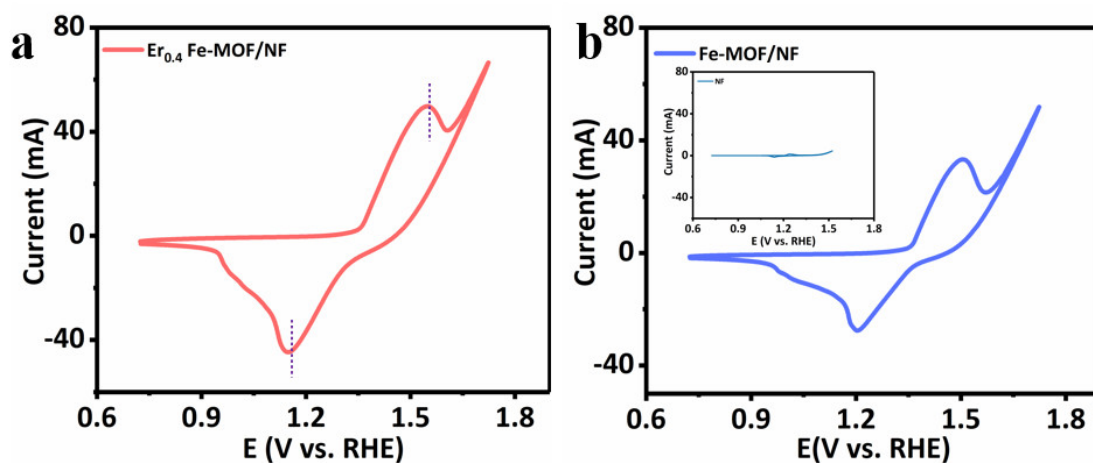

**Figure S10.** CV curves of  $\text{Er}_{0.4}\text{Fe-MOF/NF}$  (a) and  $\text{Fe-MOF/NF}$  (b) (inset image is the CV of bare NF) at a scan rate of  $5\text{ mV s}^{-1}$ .

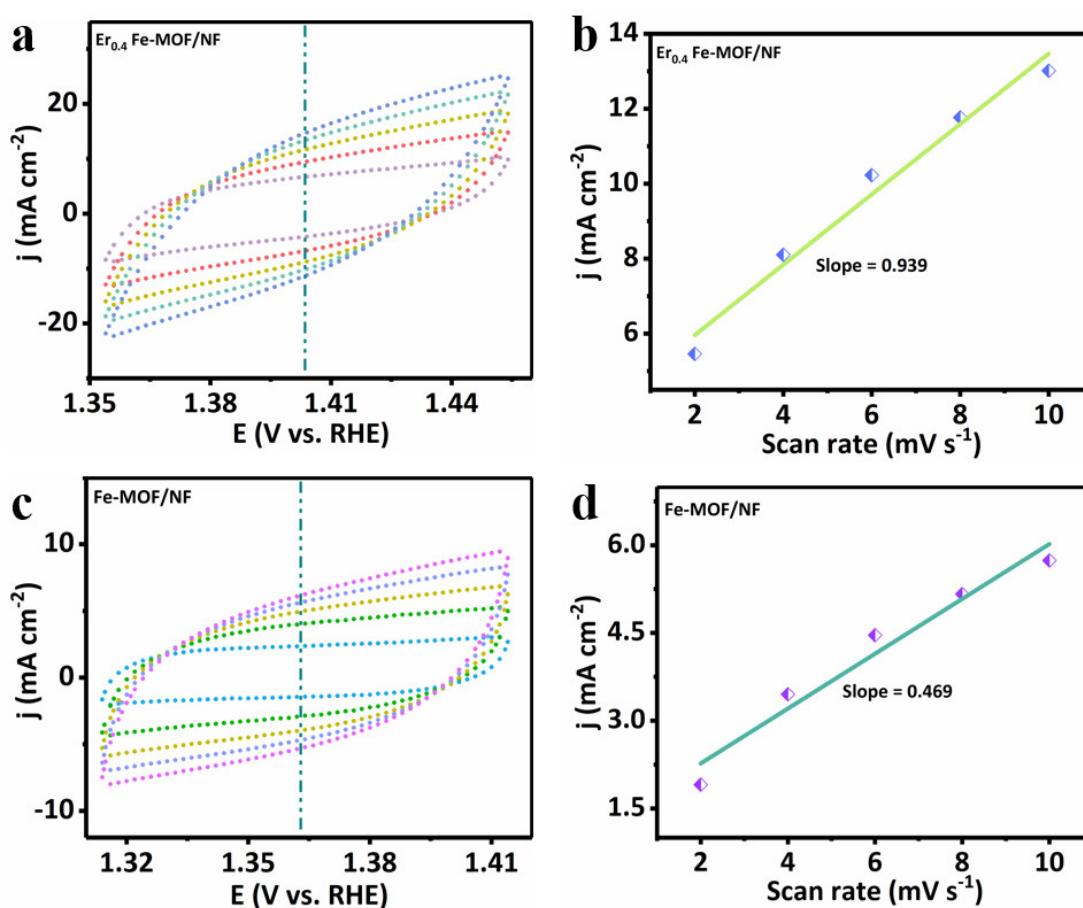

**Figure S11.** ECSA evaluations of  $\text{Er}_{0.4}\text{Fe-MOF/NF}$  (a-b) and  $\text{Fe-MOF/NF}$  (c-d).

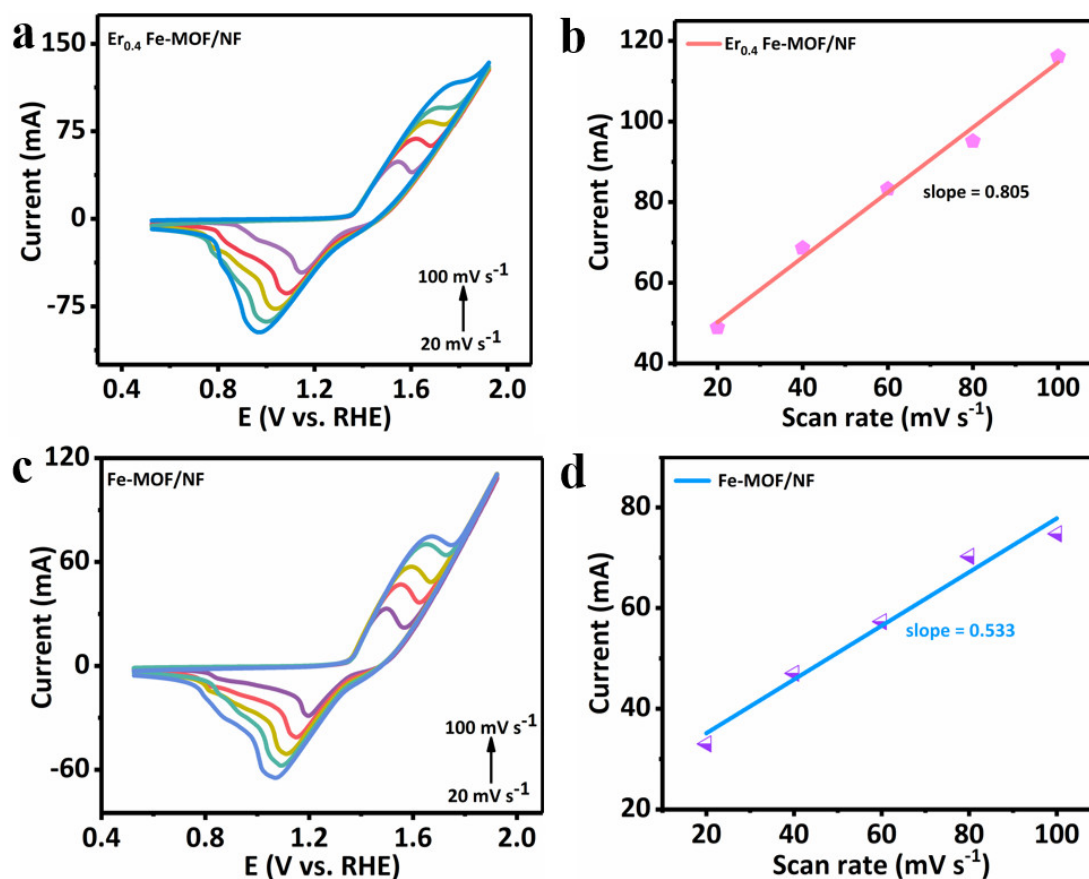

**Figure S12.** TOF evaluations of  $\text{Er}_{0.4}\text{Fe-MOF/NF}$  (a-b) and  $\text{Fe-MOF/NF}$  (c-d) with various scan rates (20, 40, 60, 80, 100  $\text{mV s}^{-1}$ ).

**Table S3.** Catalytic performance comparison of  $\text{Er}_{0.4}\text{Fe-MOF/NF}$  against other reported OER catalysts.

| Catalyst                                        | Current Density ( $\text{mA cm}^{-2}$ ) | Overpotential (mV) | Electrolyte | Ref.      |
|-------------------------------------------------|-----------------------------------------|--------------------|-------------|-----------|
| $\text{Er}_{0.4}\text{Fe-MOF/NF}$               | 100                                     | 248                | 1.0 M KOH   | This work |
| NiTe/NiS                                        | 100                                     | 257                | 1.0 M KOH   | [1]       |
| N-Ni <sub>3</sub> S <sub>2</sub> /NF            | 100                                     | 330                | 1.0 M KOH   | [2]       |
| FeOOH(Se)/IF                                    | 100                                     | 279                | 1.0 M KOH   | [3]       |
| Co <sub>1</sub> Mn <sub>1</sub> CH/NF           | 30                                      | 294                | 1.0 M KOH   | [4]       |
|                                                 | 50                                      | 322                | 1.0 M KOH   |           |
| N <sub>2</sub> Fe-NiSe@NIF                      | 100                                     | 267                | 1.0 M KOH   | [5]       |
| Mn <sub>0.52</sub> Fe <sub>0.71</sub> Ni-MOF-74 | 100                                     | 267                | 1.0 M KOH   | [6]       |
| Co-S-50/NF                                      | 100                                     | 322                | 1.0 M KOH   | [7]       |
| KT-Ni(0)@Ni(II)                                 | 100                                     | 254                | 1.0 M KOH   | [8]       |
| Ni-Gr-CNTs-Ni <sub>2</sub> P-CuP <sub>2</sub>   | 100                                     | 300                | 1.0 M KOH   | [9]       |
| MoFe:Ni(OH) <sub>2</sub> /NiOOH                 | 100                                     | 280                | 1.0 M KOH   | [10]      |
| Co-N <sub>x</sub> /C NRA                        | 10                                      | 300                | 1.0 M KOH   | [11]      |
| Fe-Ni <sub>3</sub> S <sub>2</sub> /FeNi         | 10                                      | 282                | 1.0 M KOH   | [12]      |
| Fe-Ni(OH) <sub>2</sub> /NF                      | 10                                      | 270                | 1.0 M KOH   | [13]      |
| Fe-CoOOH/G                                      | 10                                      | 330                | 1.0 M KOH   | [14]      |
| Ni <sub>3</sub> S <sub>2</sub> @NiV-LDH/NF      | 100                                     | 330                | 1.0 M KOH   | [15]      |
| P-NiCoV-LTH/NF                                  | 100                                     | 285                | 1.0 M KOH   | [16]      |



**Table S4.** Catalytic performance comparison of Er<sub>0.4</sub>Fe-MOF/NF against other reported OER catalysts at large current densities (above 250 mA cm<sup>-2</sup>).

| Catalyst                                                                            | Overpotential (mV) @ Current Density (mA cm <sup>-2</sup> ) | Electrolyte | Ref.      |
|-------------------------------------------------------------------------------------|-------------------------------------------------------------|-------------|-----------|
| Er <sub>0.4</sub> Fe-MOF/NF                                                         | 297 @ 500<br>326 @ 1000                                     | 1.0 M KOH   | This work |
| Co-S-50/NF                                                                          | 368 @ 500                                                   | 1.0 M KOH   | [7]       |
| Ni <sub>90</sub> Fe <sub>10</sub> -PC3000-2A                                        | 371 @ 400                                                   | 1.0 M KOH   | [17]      |
| Fe <sub>2</sub> O <sub>3</sub> @Ni <sub>2</sub> P/Ni(PO <sub>3</sub> ) <sub>2</sub> | 340 @ 500<br>370 @ 1000                                     | 1.0 M KOH   | [18]      |
| FeCoNiP <sub>0.5</sub> S <sub>0.5</sub> /Ti foil                                    | 360 @ 1000                                                  | 1.0 M KOH   | [19]      |
| Porous Co-P/CF                                                                      | 341 @ 500<br>380 @ 1000                                     | 1.0 M KOH   | [20]      |
| P-NiCoV-LTH/NF                                                                      | 340 @ 500<br>373 @ 1000                                     | 1.0 M KOH   | [16]      |
| (Ni-MoO <sub>2</sub> )@C/NF                                                         | 340 @ 500<br>365 @ 1000                                     | 1.0 M KOH   | [21]      |

## References

- Xue, Z.; Li, X.; Liu, Q.; Cai, M.; Liu, K.; Liu, M.; et al. Interfacial electronic structure modulation of NiTe nanoarrays with NiS nanodots facilitates electrocatalytic oxygen evolution. *Adv. Mater.* **2019**, *31*, 1900430.
- Chen, P.; Zhou, T.; Zhang, M.; Tong, Y.; Zhong, C.; Zhang, N.; et al. 3D nitrogen-anion-decorated nickel sulfides for highly efficient overall water splitting. *Adv. Mater.* **2017**, *29*, 1701584.
- Niu, S.; Jiang, W.J.; Wei, Z.; Tang, T.; Ma, J.; Hu, J.S.; et al. Se-doping activates FeOOH for cost-effective and efficient electrochemical water oxidation. *J. Am. Chem. Sci.* **2019**, *17*, 7005-7013.
- Tang, T.; Jiang, W.J.; Niu, S.; Liu, N.; Luo, H.; Chen, Y.Y.; et al. Electronic and morphological dual modulation of cobalt carbonate hydroxides by Mn doping towards highly efficient and stable bifunctional electrocatalysts for overall water splitting. *J. Am. Chem. Sci.* **2017**, *24*, 8320-8328.
- Chen, J.; Chen, J.; Cui, H.; Wang, C. Electronic structure and crystalline phase dual modulation via anion-cation Co-doping for boosting oxygen evolution with long-term stability under large current density. *ACS Appl. Mater. Inter.* **2019**, *11*, 34819-34826.
- Zhou, W.; Xue, Z.; Liu, Q.; Li, Y.; Hu, J.; Li, G. Trimetallic MOF-74 films grown on Ni foam as bifunctional electrocatalysts for overall water splitting. *ChemSusChem* **2020**, *13*, 5647-5653.
- Yang, W.; Zeng, J.; Hua, Y.; Xu, C.; Siwal, S.S.; Zhang, Q. Defect engineering of cobalt microspheres by S doping and electrochemical oxidation as efficient bifunctional and durable electrocatalysts for water splitting at high current densities. *J. Power Sources* **2019**, *436*, 226887.
- Hu, Q.; Wang, Z.; Huang, X.; Qin, Y.; Yang, H.; Ren, X.; et al. Integrating well-controlled core-shell structures into "superaerophobic" electrodes for water oxidation at large current densities. *Appl. Catal. B: Environ.* **2021**, *286*, 119920.
- Riyajuddin, S.; Azmi, K.; Pahuja, M.; Kumar, S.; Maruyama, T.; Bera, C.; et al. Super-hydrophilic hierarchical Ni-foam-graphene-carbon nanotubes-Ni<sub>2</sub>P-CuP<sub>2</sub> nano-architecture as efficient electrocatalyst for overall water splitting. *ACS Nano* **2021**, *15*, 5586-5599.
- Jin, Y.; Huang, S.; Yue, X.; Du, H.; Shen, P.K. Mo- and Fe-modified Ni(OH)<sub>2</sub>/NiOOH nanosheets as highly active and stable electrocatalysts for oxygen evolution reaction. *ACS Catal.* **2018**, *8*, 2359-2363.
- Amiin, I.S.; Liu, X.; Pu, Z.; Li, W.; Li, Q.; Zhang, J.; et al. From 3D ZIF nanocrystals to Co-N<sub>x</sub>/C nanorod array electrocatalysts for ORR, OER, and Zn-Air batteries. *Adv. Funct. Mater.* **2018**, *28*, 1704638.
- Yuan, C.Z.; Sun, Z.T.; Jiang, Y.F.; Yang, Z.K.; Jiang, N.; Zhao, Z.W.; et al. One-step in situ growth of iron-nickel sulfide nanosheets on FeNi alloy foils: high-performance and self-supported electrodes for water oxidation. *Small* **2017**, *13*, 1604161.
- Liu, J.; Zhu, D.; Zheng, Y.; Vasileff, A.; Qiao, S.Z. Self-supported earth-abundant nanoarrays as efficient and robust electrocatalysts for energy-related reactions. *ACS Catal.* **2018**, *8*, 6707-6732.
- Han, X.; Yu, C.; Zhou, S.; Zhao, C.; Huang, H.; Yang, J.; et al. Ultrasensitive iron-triggered nanosized Fe-CoOOH integrated with graphene for highly efficient oxygen evolution. *Adv. Energy Mater.* **2017**, *7*, 1602148.
- Liu, Q.; Huang, J.; Zhao, Y.; Cao, L.; Li, K.; Zhang, N.; et al. Tuning the coupling interface of ultrathin Ni<sub>3</sub>S<sub>2</sub>@NiV-LDH heterogeneous nanosheet electrocatalysts for improved overall water splitting. *Nanoscale* **2019**, *11*, 8855-8863.
- Liu, Q.; Huang, J.; Zhang, X.; Cao, L.; Yang, D.; Kim, J.; Feng, L. Controllable conversion from single-crystal nanorods to polycrystalline nanosheets of NiCoV-LTH for oxygen evolution reaction at large current density. *ACS Sustain. Chem. Eng.* **2020**, *43*, 16091-16096.



17. Huang, C.L.; Chuah, X.F.; Hsieh, C.T.; Lu, S.Y. NiFe alloy nanotube arrays as highly efficient bifunctional electrocatalysts for overall water splitting at high current densities. *ACS Appl. Mater. Inter.* **2019**, *11*, 24096-24106.
18. Cheng, X.; Pan, Z.; Lei, C.; Jin, Y.; Yang, B.; Li, Z.; et al. A strongly coupled 3D ternary Fe<sub>2</sub>O<sub>3</sub>@Ni<sub>2</sub>P/Ni(PO<sub>3</sub>)<sub>2</sub> hybrid for enhanced electrocatalytic oxygen evolution at ultra-high current densities. *J. Mater. Chem. A* **2019**, *7*, 965-971.
19. Wang, X.; Ma, W.; Ding, C.; Xu, Z.; Wang, H.; Zong, X.; Li, C. Amorphous multi-elements electrocatalysts with tunable bifunctionality towards overall water splitting. *ACS Catal.* **2018**, *11*, 9926-9935.
20. Li, Y.; Wei, B.; Yu, Z.; Bondarchuk, O.; Araujo, A.; Amorim, I.; et al. Bifunctional porous cobalt phosphide foam for high-current density alkaline water electrolysis with 4000-hour long stability. *ACS Sustain. Chem. Eng.* **2020**, *8*, 10193-10200.
21. Qian, G.; Chen, J.; Luo, L.; Yu, T.; Wang, Y.; Jiang, W.; et al. Industrially promising nanowire heterostructure catalyst for enhancing overall water splitting at large current density. *ACS Sustain. Chem. Eng.* **2020**, *8*, 12063-12071.
